# Supplementary material
Source: publisher figshare collection journal article supplement (https://brill.figshare.com/ndownloader/files/26729219)
Supplement: Supplementary file 1 [file 26729219]

## Sheet: Primers in this study
Supplementary Table 1. Confirmation of selected regulated genes between Guinongzhan and Wushansimiao (R534) by quantitative real-time PCR.
Genes	Forward-primer (5'→3')	Reverse-primer (5'→3')
Calcium-dependent protein kinase 13 (CDPK13), BGIOSGA026567	CACATGGACAAGGACAAG	CGTTGCTCATCTTCTTCAG
Calcium-binding proteins 12 (CaMCML12), BGIOSGA001257	ATCTGCTACGCCGAACTC	AACTCCTCGAAGCTGATGA
protein phosphatase 2C 30 (PP2C30), BGIOSGA011032	CCTCTCATGCGACCATAA	GTCCTTCCTCTCCATCAC
Expansin-like A3 (EXLA3), BGIOSGA024325	GAACCTGTCCATATTAGTAGAAG	AACATCCACCGCTAAGATA
Cellulose synthase -like 1 (CSLA1), BGIOSGA006970	CAACGCTCTGAAGATGAA	GATACCGACGATGAAGAAC
Cellulose synthase 1 (CESA1), BGIOSGA018714	ATTACATCCATTCCACTTATCG	TACCAACACCACTCCATC
Auxin response factor (ARF2), BGIOSGA001046	CATCCTCTCCATCATCTGT	GTTCTTGCCATATCTTGTGTA
Auxin-responsive protein 32 (SAUR32), BGIOSGA020539	GGTGGGTTATCTGAAGCA	TTCTGGTGGTGGATGATG
Pectin methylesterase 3 (PME3), BGIOSGA000847	ACTACTACAAGGAATGCTACA	CAGTTGACGAACGAGAAC
chitin elicitor receptor kinase 1， BGIOSGA029074	ATCAACCGAATCTTCAAGTG	TGGAATCAATAGGATAATCTTCTC
respiratory burst oxidase homolog protein B,BGIOSGA001663	GCGTATTCTTCGGTTGTT	AGGTGCTGATGTTATGGA
auxin transporter-like protein 3, BGIOSGA012220	AAGGCGATCTACCTGATG	GGTGATGAACTGGTGGAT
Mitogen-activated protein kinase kinase 1, BGIOSGA003620	CAGGGATATAAAGCCATCTAAC	GTCACTCTTGTAGTCATAGGA
heat shock protein 90, BGIOSGA026730	CTCGTCTTGCTCCTCTTC	CTCCTCCATCTTGCTCTC
two-component response regulator ORR21, BGIOSGA012149	GGACTCTGGCTTACTCTC	ACCATAACTGTCAACATTCG
probable protein phosphatase 2C 53, BGIOSGA003839	CATCATCGTTGCTAATTG	CATTCCACTGTATAACCTT
probable protein phosphatase 2C 8, BGIOSGA004140	GACAGACCTGACGAGATG	CAAGGACACCGAGGATAC
probable protein phosphatase 2C 9, BGIOSGA017925	GTACAAGAAGGCGGTCTC	CGAACCCTTTCTCCATGA
serine/threonine-protein kinase, BGIOSGA033386	GACCTTACTGCCATCCAT	CATCTGTTGAGTCCATTCTTG
transcription factor MYC2, BGIOSGA033493	AAGAGCAACAACCAGAAGA	GACGAGAAGGACAGCATC
regulatory protein NPR1,BGIOSGA002207	TGGATATTGCTCAAGTGGAT	TTGGAGAGTGCTGTCATC
regulatory protein NPR3, BGIOSGA010095	CTGGTCTCACATCTGCTAA	TCGGTGGATTCTTCATTCA
regulatory protein NPR3, BGIOSGA004522	ATGCGGTTCTGTGAGTTA	AGAGGACGATGAAGATGAC
respiratory burst oxidase homolog protein B, BGIOSGA037531	CTCTTCGTCATCGTCTACA	GCAACCTTCTCAATCCTTAC
WRKY45-2 transcription factor, BGIOSGA019621	CTCGTCTTGCTCCTCTTC	CTCCTCCATCTTGCTCTC
WRKY74 transcription factor, BGIOSGA030535	CACTTATTGCAGATGTTGT	CTTTGCCTCGGCTACCATC
WRKY24transcription factor, BGIOSGA004722	CCGTGATCACCACCTACG	CGCCGAACCCGTCGGGCCT
WRKY71 transcription factor, BGIOSGA007670	GAAGCCACCCCATGCGCC	CGGTGACGAGCGCCGCCTT
WRKY51transcription factor, BGIOSGA009380	CGACTTCTCGTGGCGGA	TGGACGGGTCGGCGGGGT
WRKY transcription factor 70, BGIOSGA017876	GGCGAGCAACGCCGGCA	AGAGTAAGACGCTCCCGT
WRKY53Transcription factor,BGIOSGA019646	CCGAGGAGCTACTACAAG	GTCGTCGGCGCAGGCGGC
Leucine-rich repeat receptor-like protein kinase (FLS2),BGIOSGA014335	CAAGCCGTCCAACGTCCTG	TCGTCGACACCGTCCTCATG
chitin elicitor-binding protein, BGIOSGA011785	GTACAGAACAAGGGATGCC	TAGCGAACTGCGACCTC
serine/threonine-protein kinase PBS1, BGIOSGA008300	TCTCCAGGAACGACGAAG	TTGCCTCGGCTACCATCC
Os_ubi	CCAGTAAGTCCTCAGCCATGGAG	GGACACAATGATTAGGGATC
